# Supplementary material for: Amino acid ester-coupled caffeoylquinic acid derivatives as potential hypolipidemic agents: synthesis and biological evaluation
Source: PubMed Central journal article supplement — RSC Adv. 2021 Jan 5;11(3):1654–61. doi: 10.1039/d0ra09621k (PMC8693647; doi:10.1039/d0ra09621k), 2021-01-05
Supplement: RA-011-D0RA09621K-s001.pdf [file RA-011-D0RA09621K-s001.pdf]

## **Amino acid ester-coupled Caffeoylquinic acid Derivatives as Potential Hypolipidemic Agents: Synthesis and Biological Evaluation**

Xi Zhang<sup>†</sup>, Dong-yun Liu<sup>†</sup>, Hai Shang, Yi Jia, Xu-Dong Xu, Yu Tian\*, Peng Guo\*

*Institute of Medicinal Plant Development, Chinese Academy of Medical Sciences & Peking Union Medical College, Beijing, 100193, P. R. China.*

\*Correspondence authors. Address: Institute of Medicinal Plant Development, Chinese Academy of Medical Sciences & Peking Union Medical College, No. 151, Malianwa North Road, Haidian District, Beijing 100193, PR China. Tel: +86-010-57833296; Fax: +86-010-57833296.

*E-mail addresses:* [ytian@implad.ac.cn](mailto:ytian@implad.ac.cn) (Yu Tian).

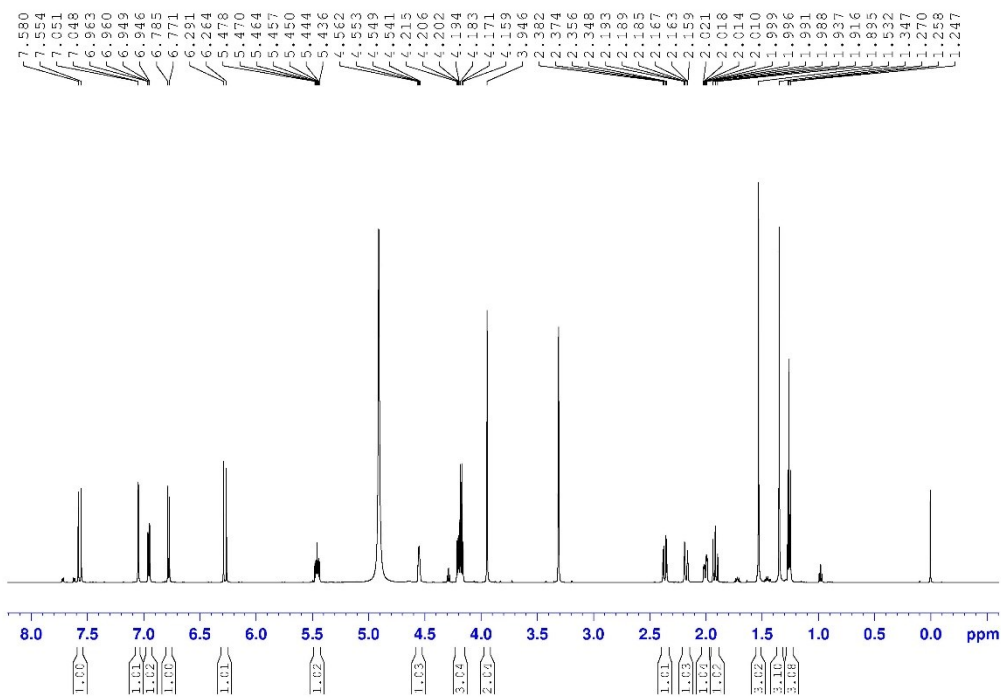

<sup>1</sup>H NMR of compound **5a**

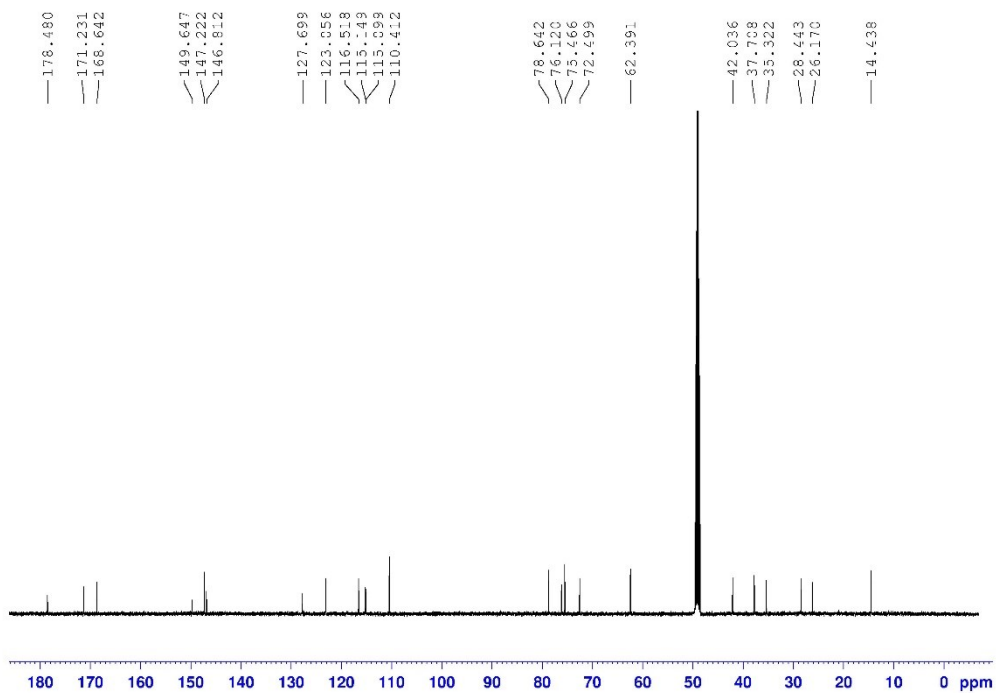

<sup>13</sup>C NMR of compound **5a**

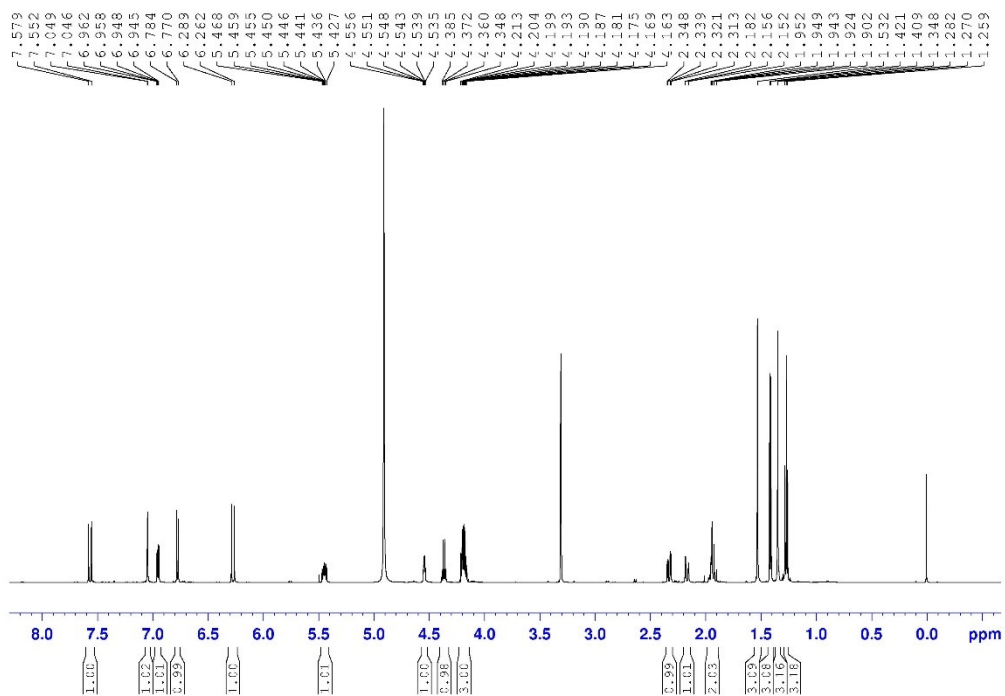

$^1\text{H}$  NMR of compound **5b**

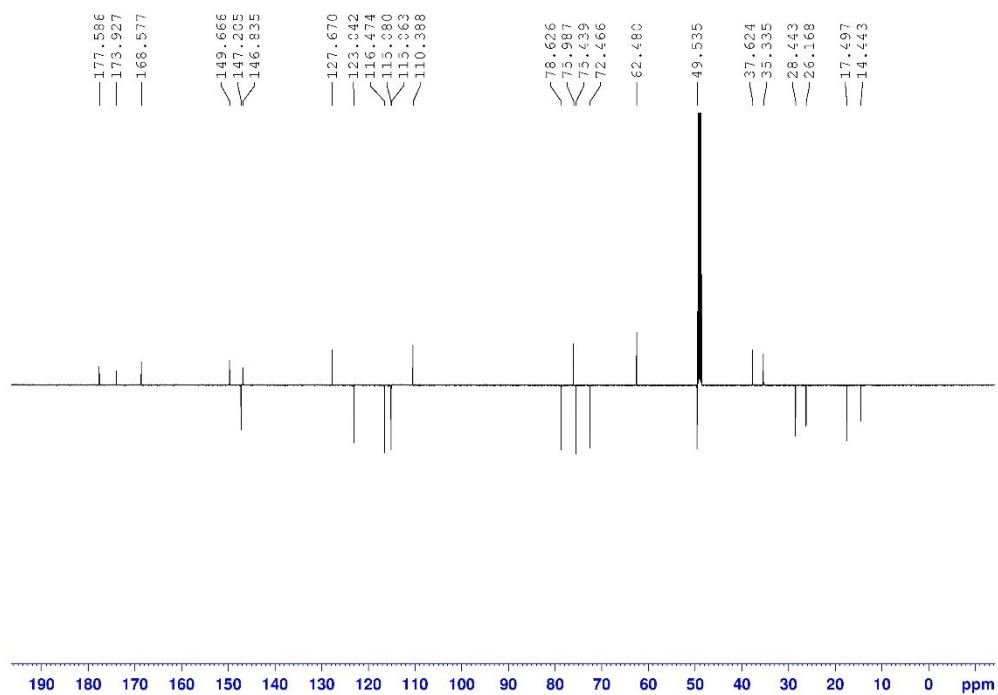

$^{13}\text{C}$  APT of compound **5b**

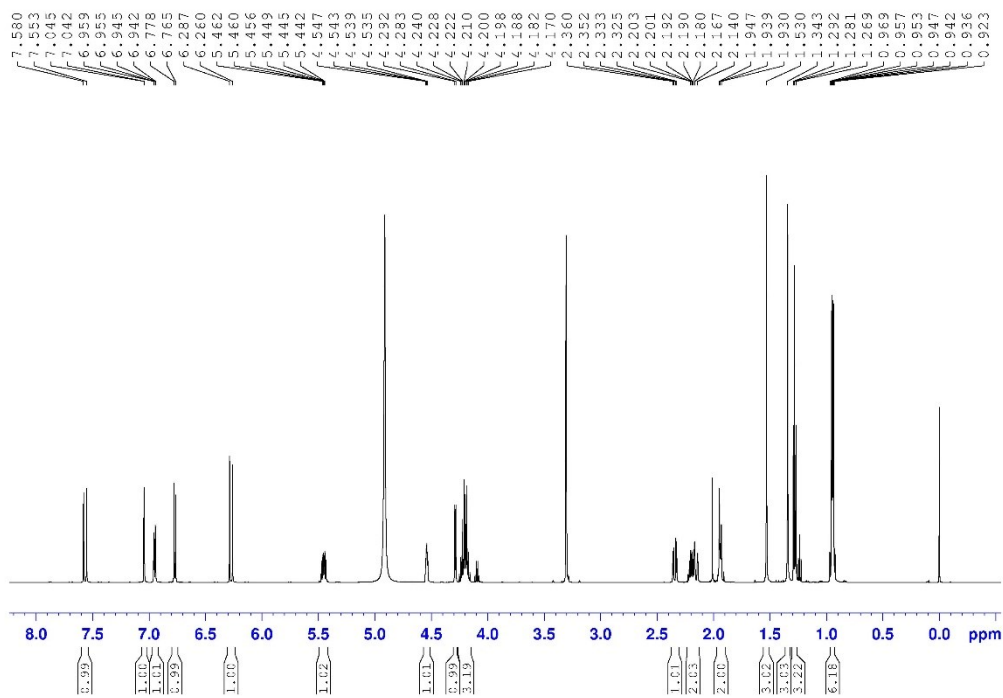

<sup>1</sup>H NMR of compound 5c

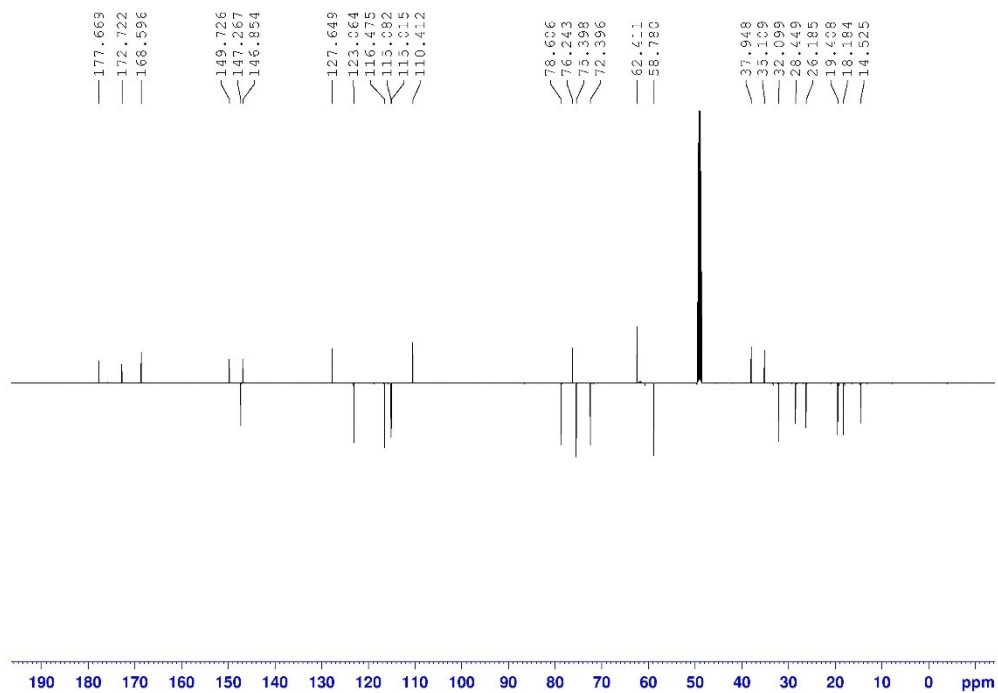

<sup>13</sup>C APT of compound 5c

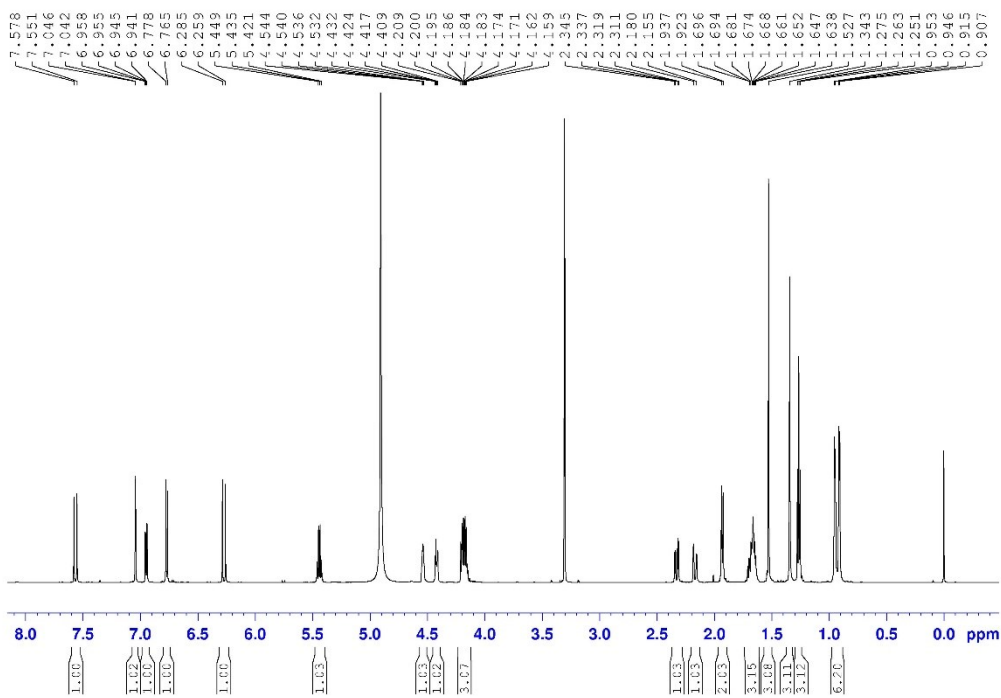

<sup>1</sup>H NMR of compound **5d**

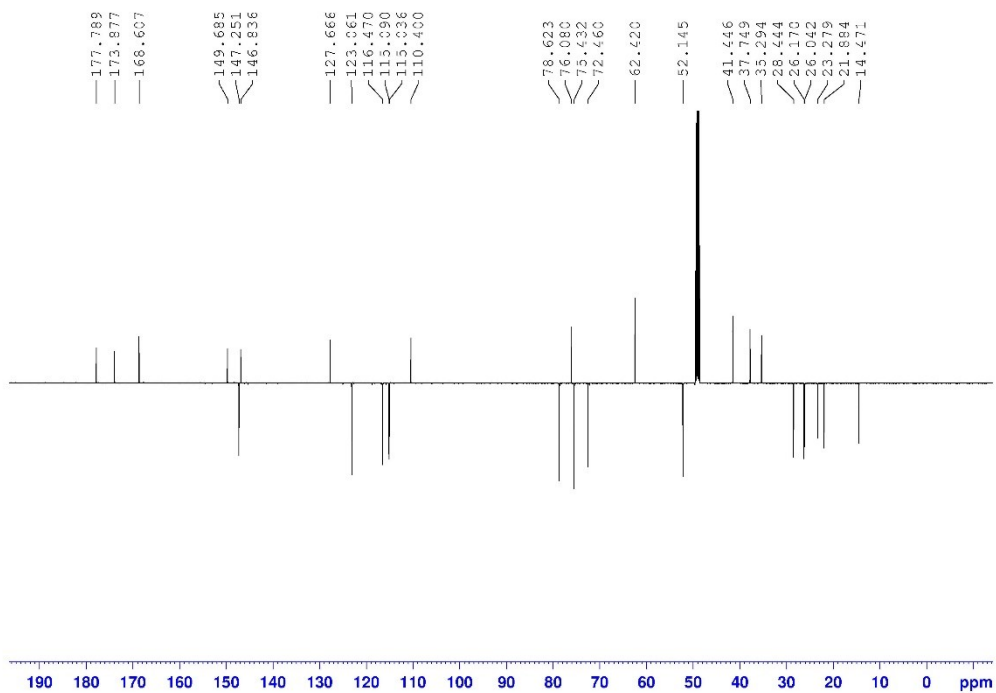

<sup>13</sup>C APT of compound **5d**

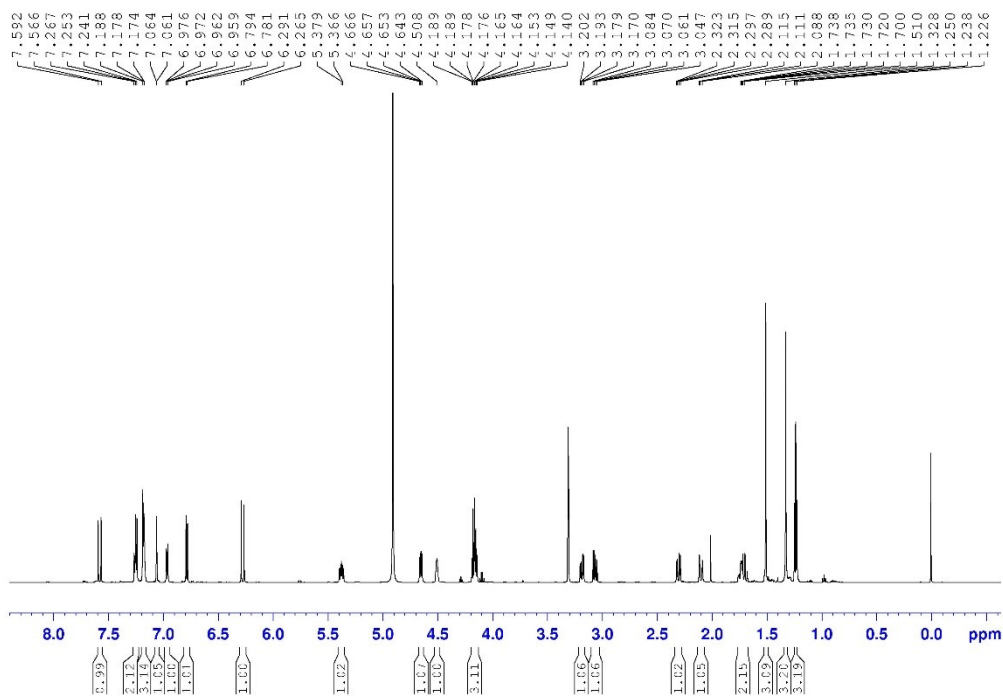

$^1\text{H}$  NMR of compound **5e**

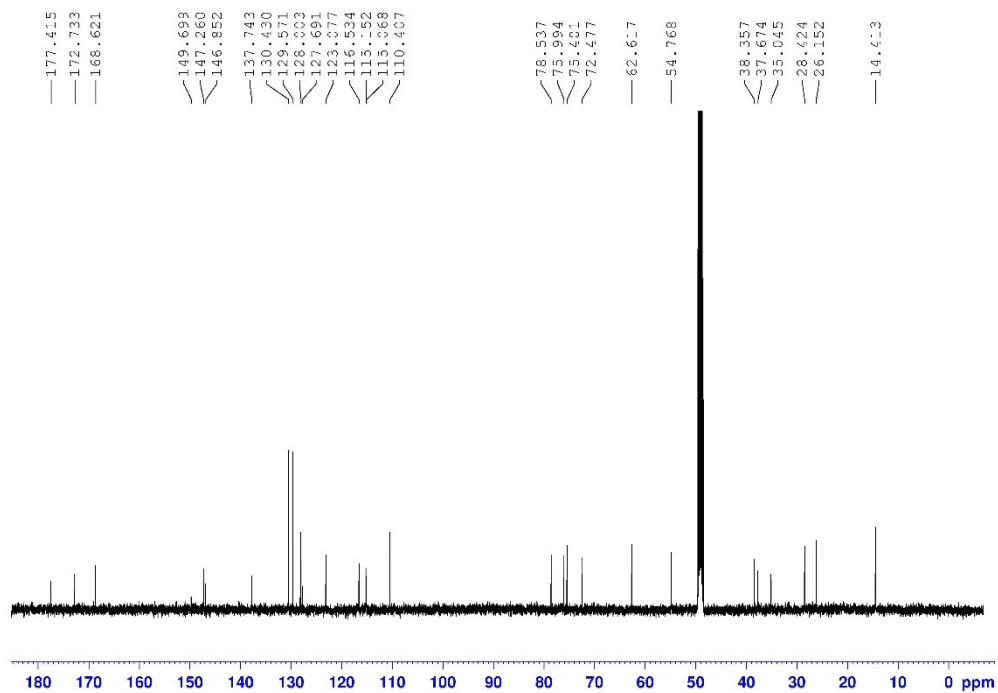

$^{13}\text{C}$  NMR of compound **5e**



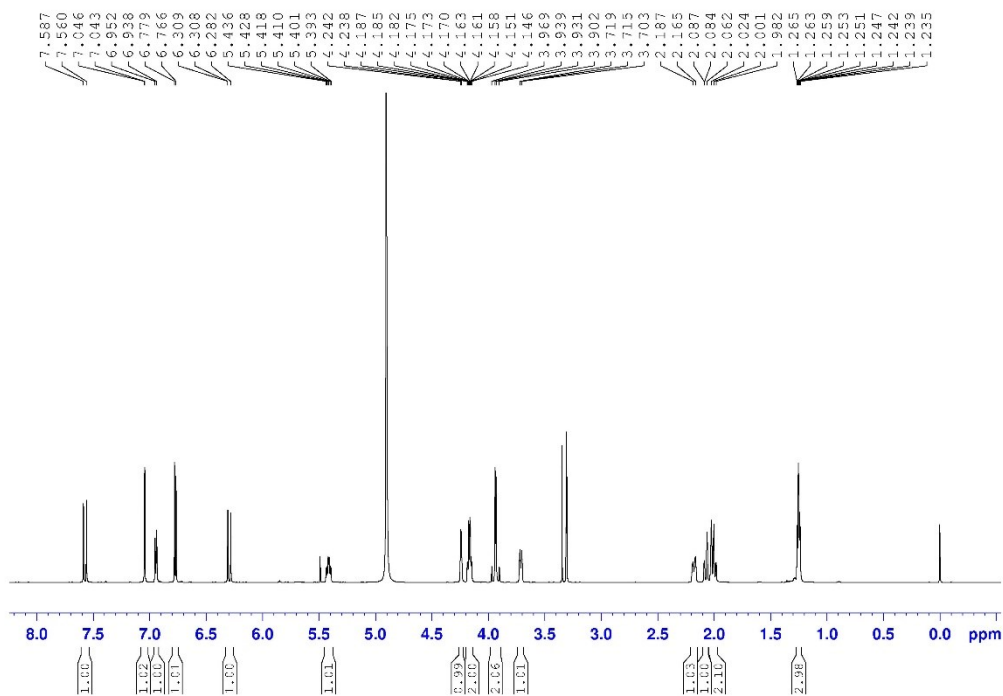

$^1\text{H}$  NMR of compound **6a**

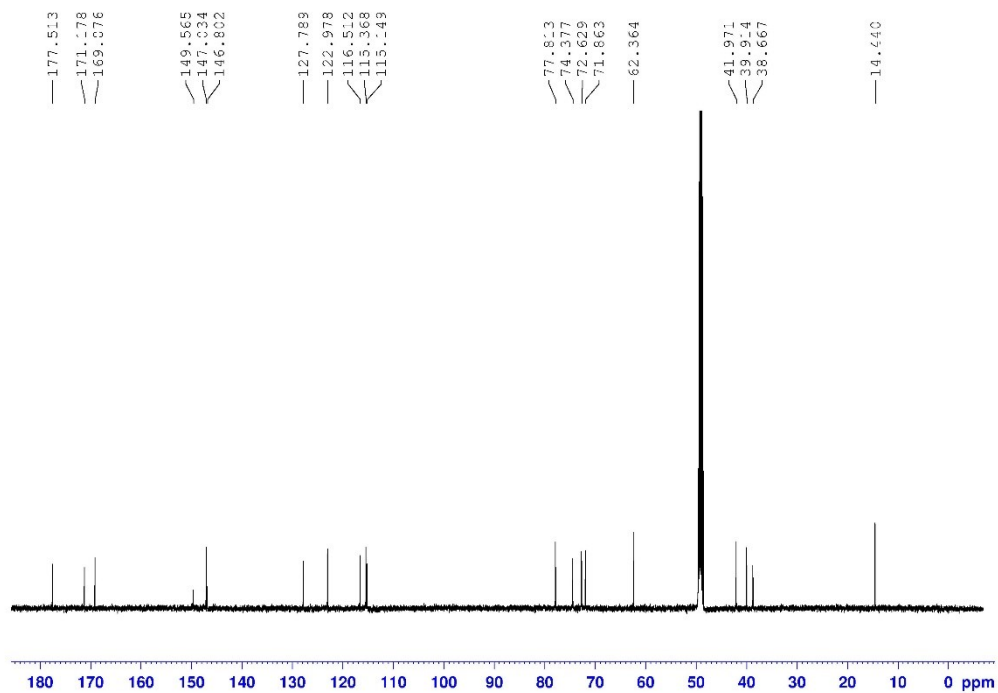

$^{13}\text{C}$  NMR of compound **6a**



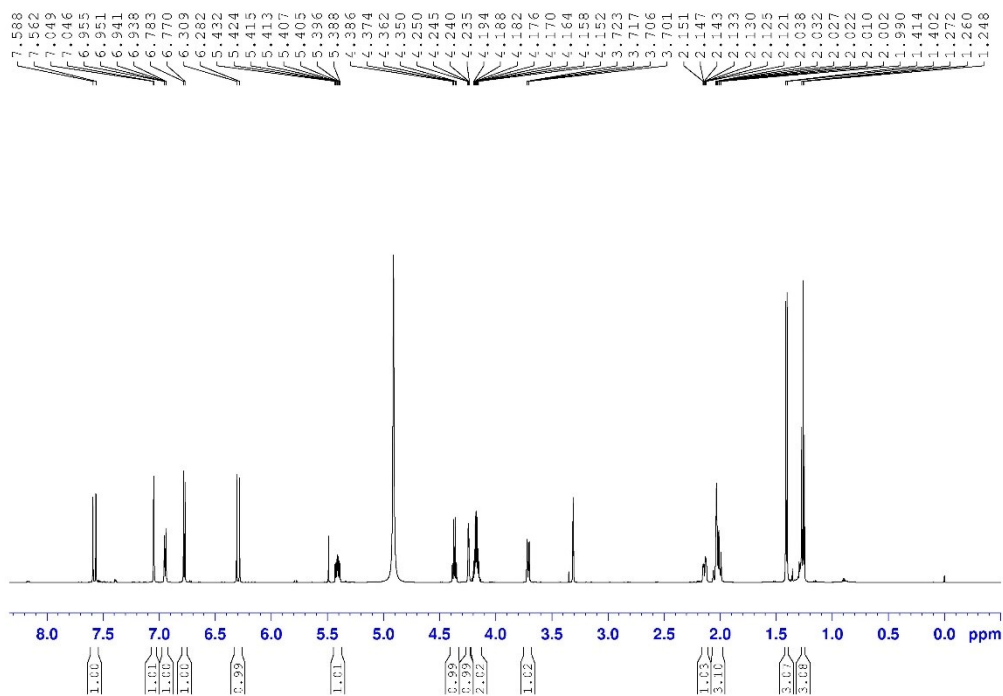

$^1\text{H}$  NMR of compound **6b**

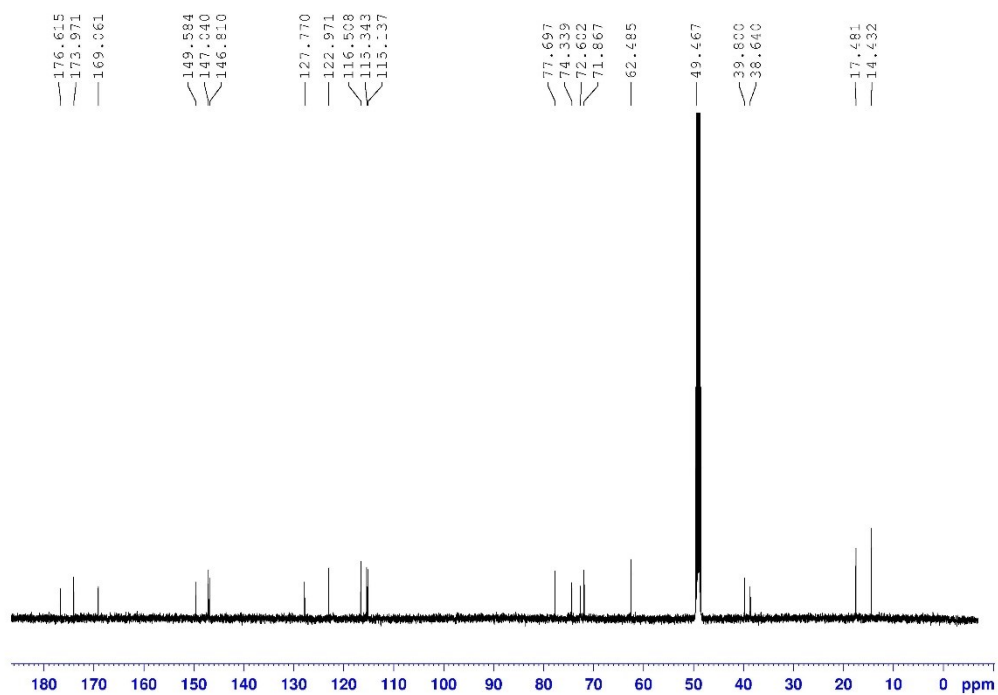

$^{13}\text{C}$  NMR of compound **6b**

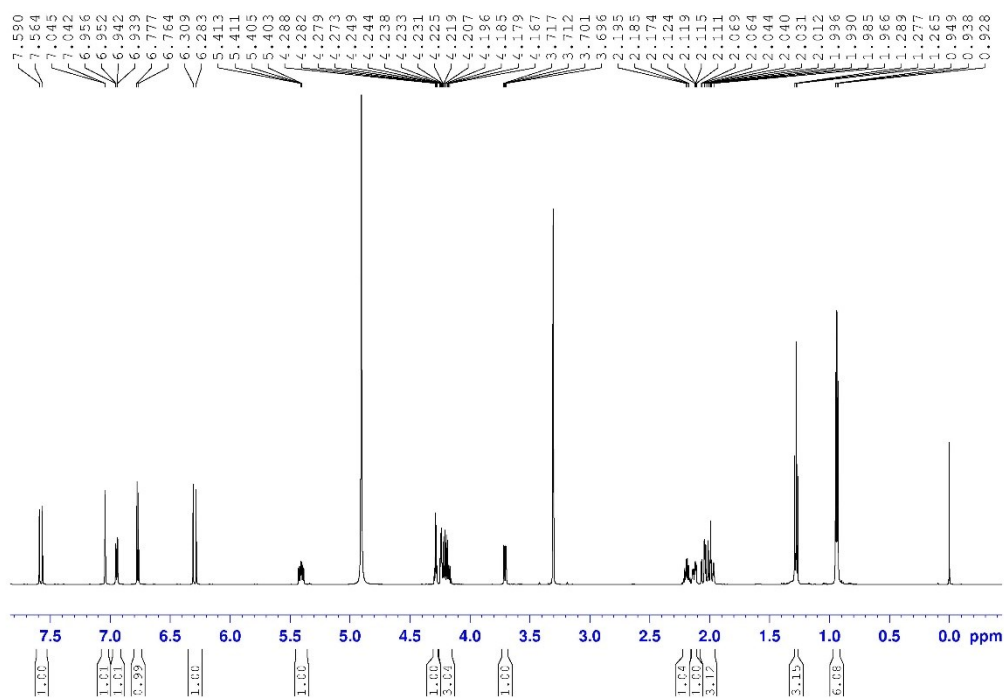

<sup>1</sup>H NMR of compound **6c**

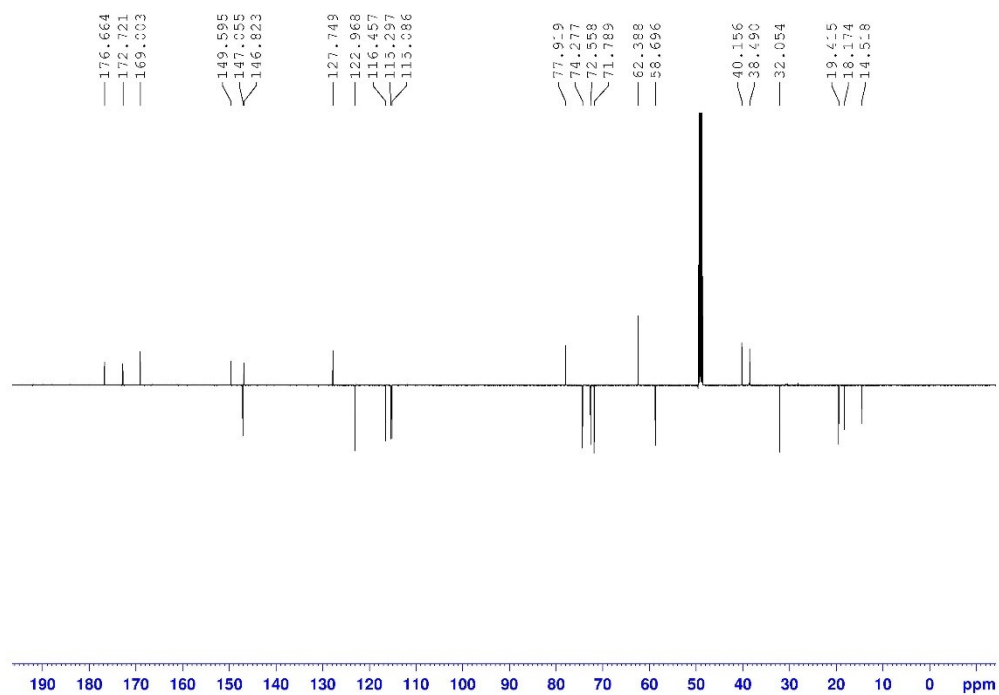

<sup>13</sup>C APT of compound **6c**

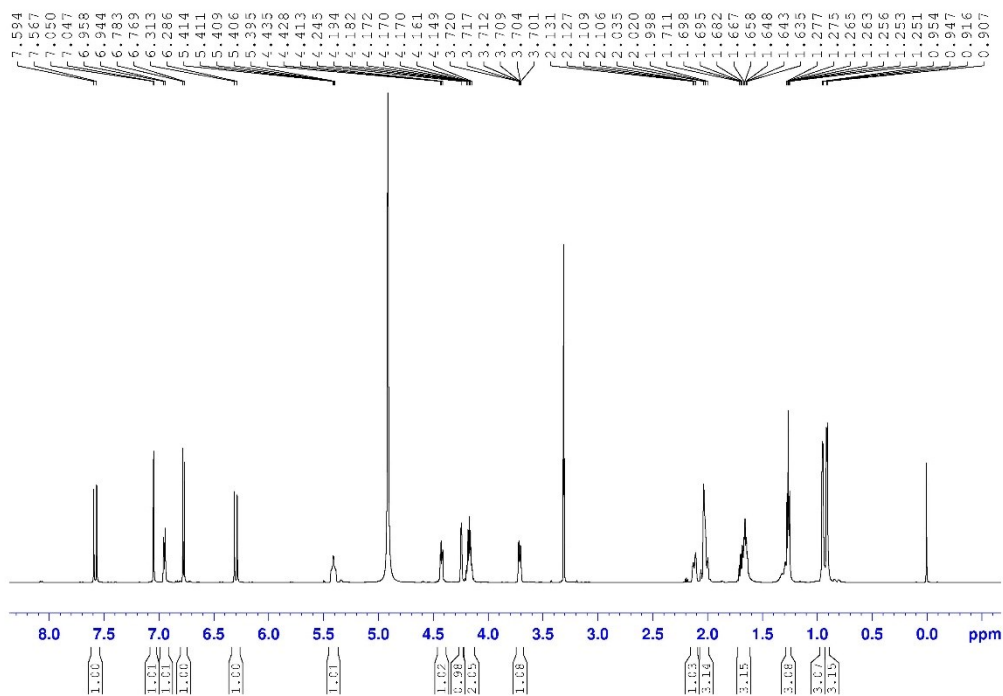

<sup>1</sup>H NMR of compound **6d**

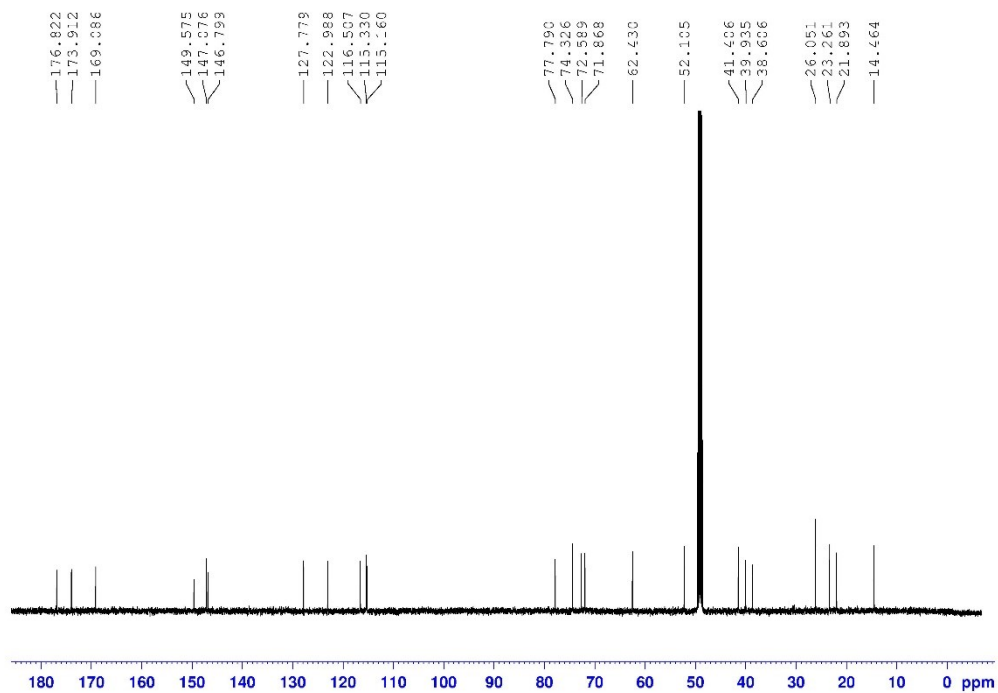

<sup>13</sup>C NMR of compound **6d**

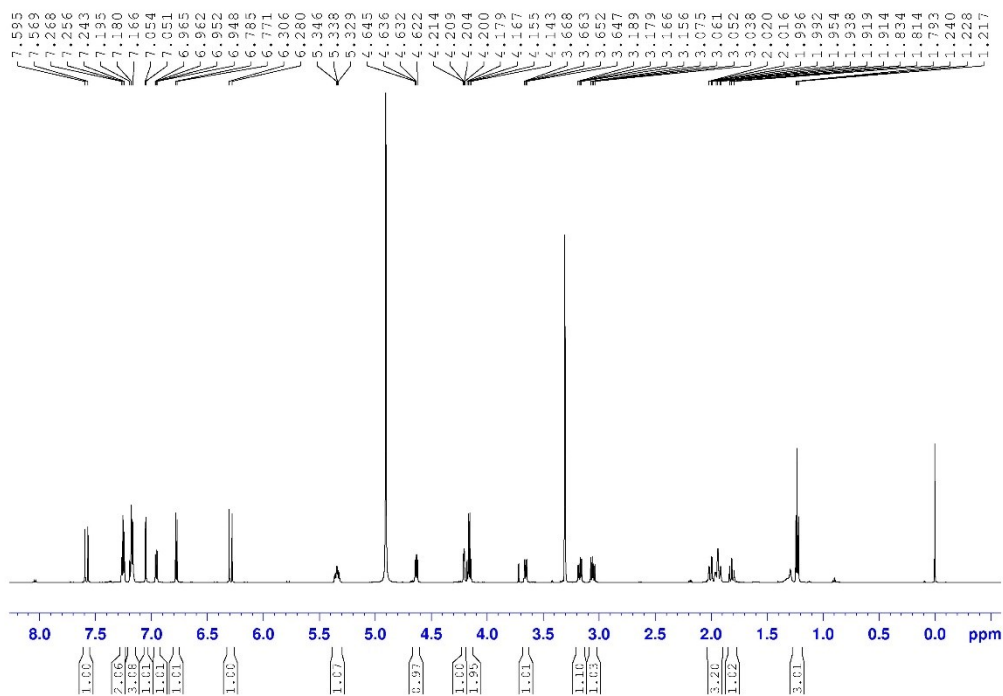

$^1\text{H}$  NMR of compound **6e**

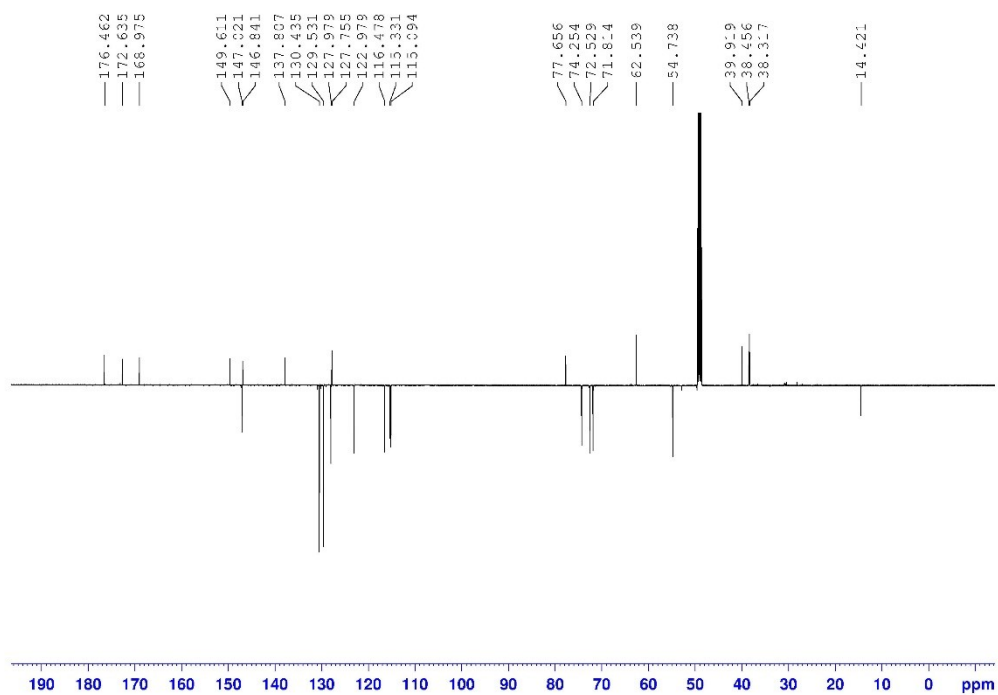

$^{13}\text{C}$  APT of compound **6e**



CA-ACE-GLY\_191025130029 #1 RT: 0.00 AV: 1 NL: 1.72E8  
T: FTMS + p ESI Full ms [200.00-1000.00]

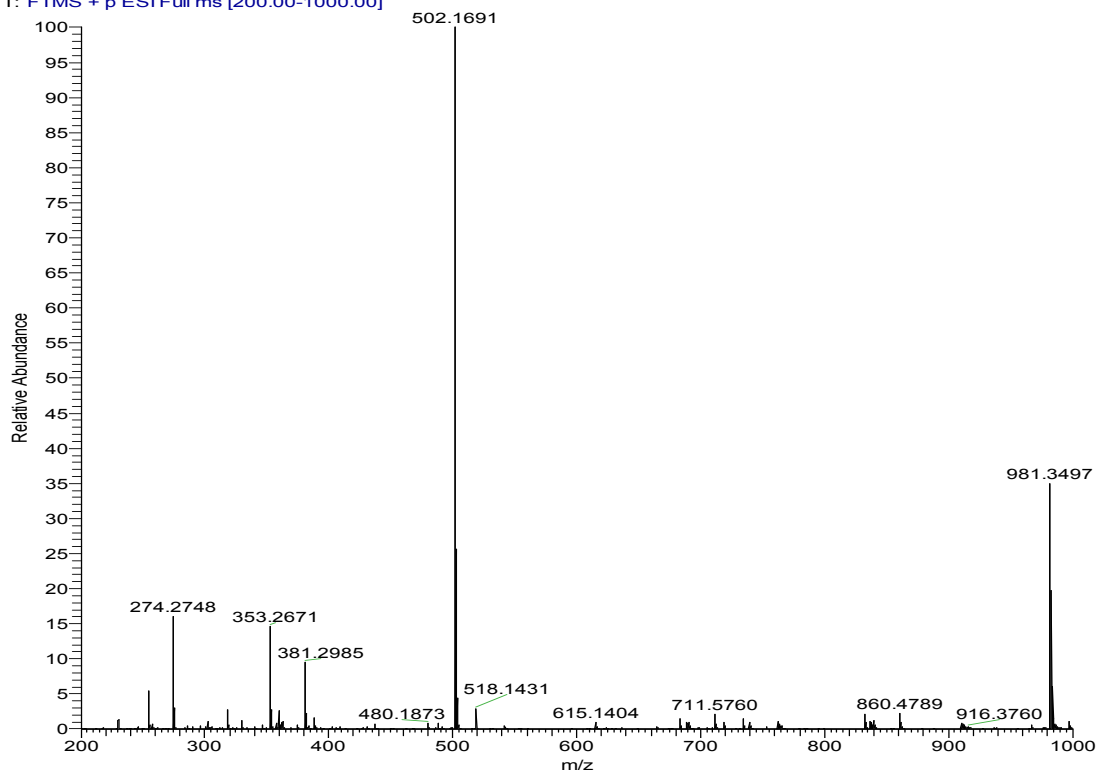

HRMS of compound 5a

CA-ACE-ALA\_191025130029 #1 RT: 0.00 AV: 1 NL: 1.13E8  
T: FTMS + p ESI Full ms [200.00-1000.00]

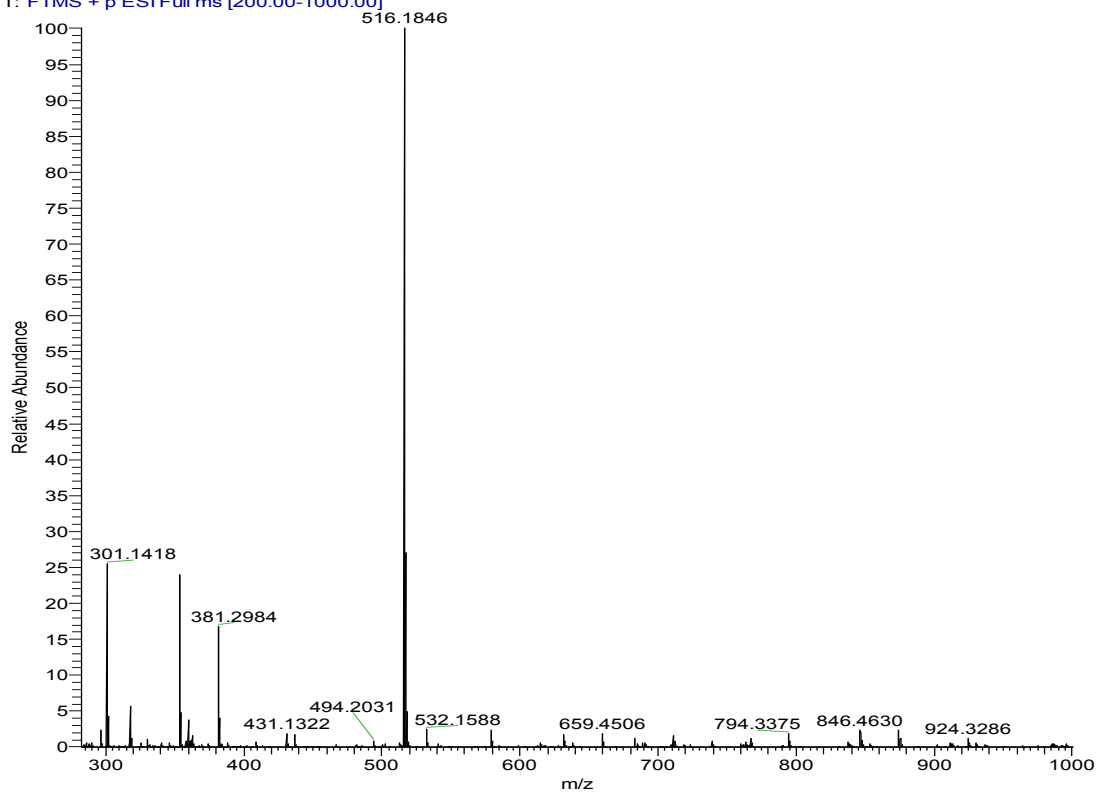

HRMS of compound 5b

CA-ACE-VAL\_191025133906 #1 RT: 0.00 AV: 1 NL: 8.83E7  
T: FTMS + p ESI Full ms [200.00-1000.00]

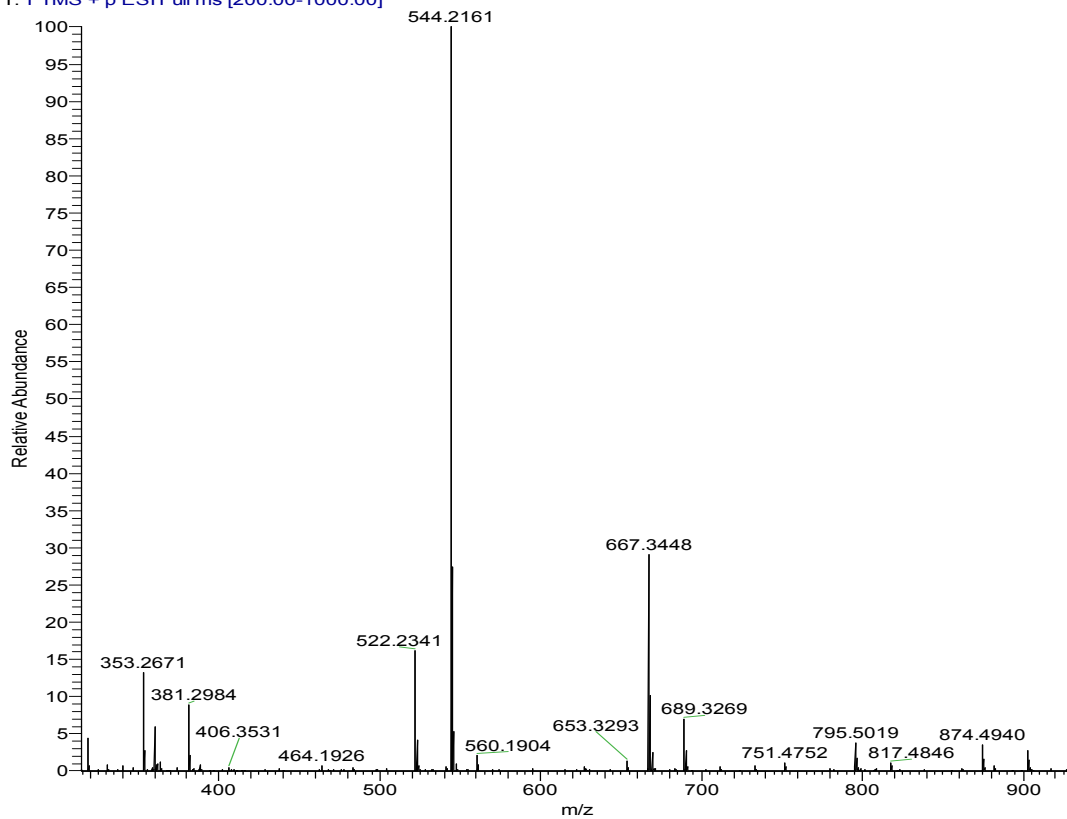

HRMS of compound 5c

CA-ACE-LEU\_191025135938 #1 RT: 0.01 AV: 1 NL: 8.36E7  
T: FTMS + p ESI Full ms [200.00-1000.00]

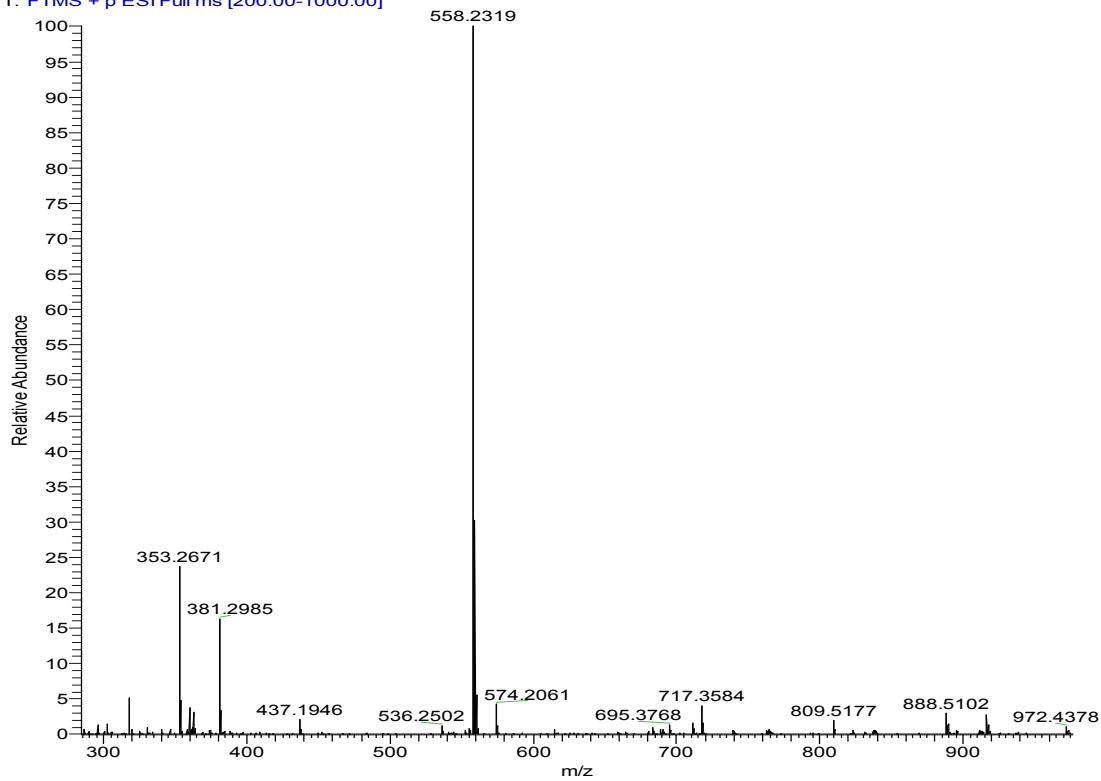

HRMS of compound 5d

CA-ACE-PHE\_191025135124 #1 RT: 0.00 AV: 1 NL: 7.10E7  
T: FTMS + p ESI Full ms [200.00-1000.00]

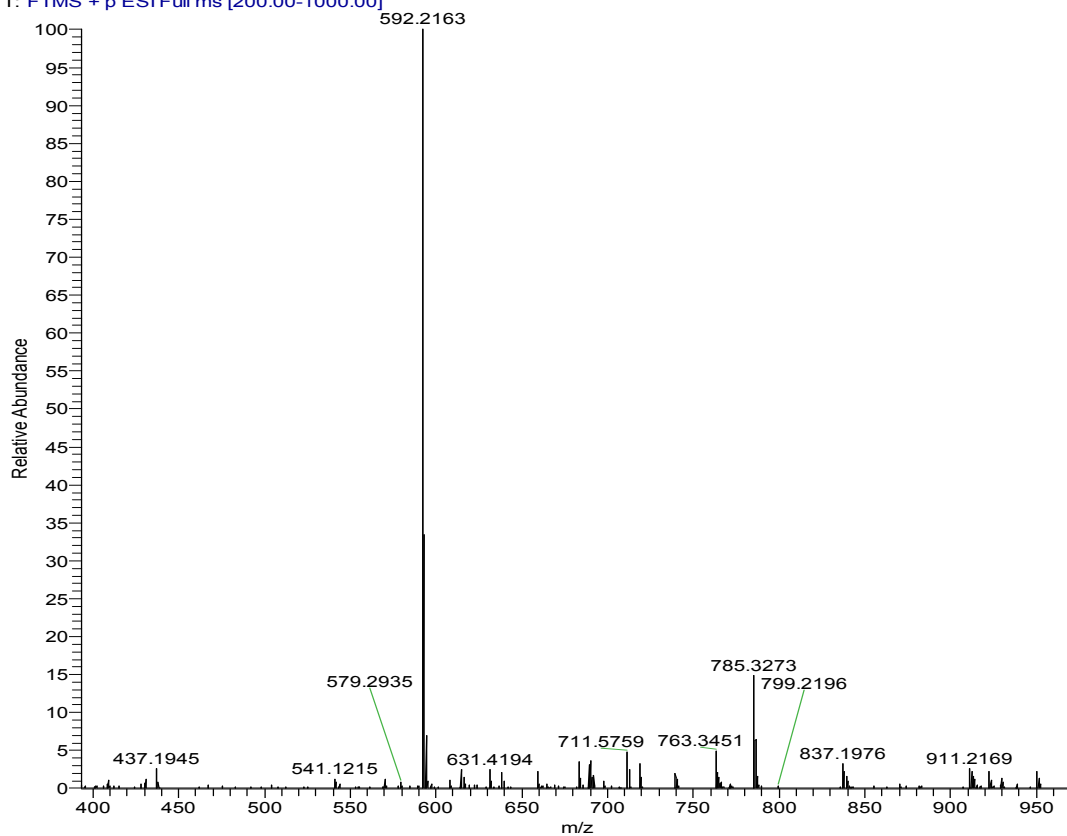

HRMS of compound 5e

CA-ACE-TRP\_191025141711 #1 RT: 0.01 AV: 1 NL: 5.02E7  
T: FTMS + p ESI Full ms [200.00-1000.00]

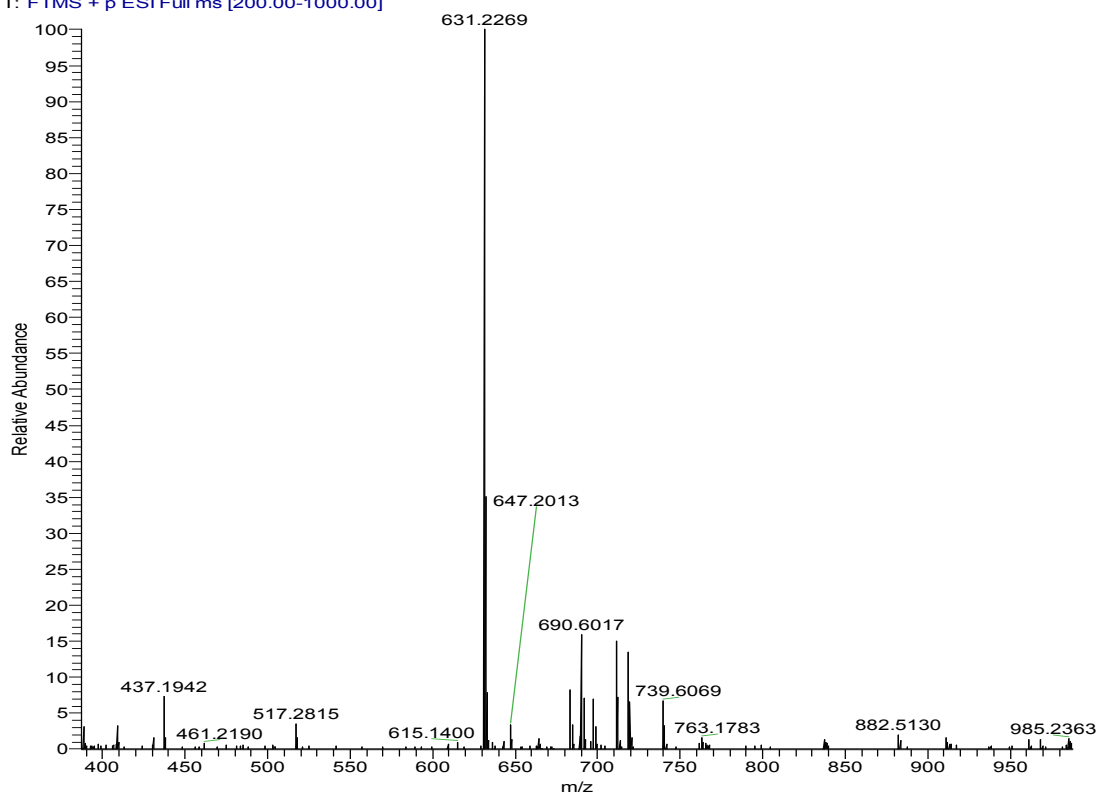

HRMS of compound 5f



CA-ACE-GLY-OH\_191025130029 #1 RT: 0.01 AV: 1 NL: 8.50E7  
T: FTMS + p ESI Full ms [200.00-1000.00]

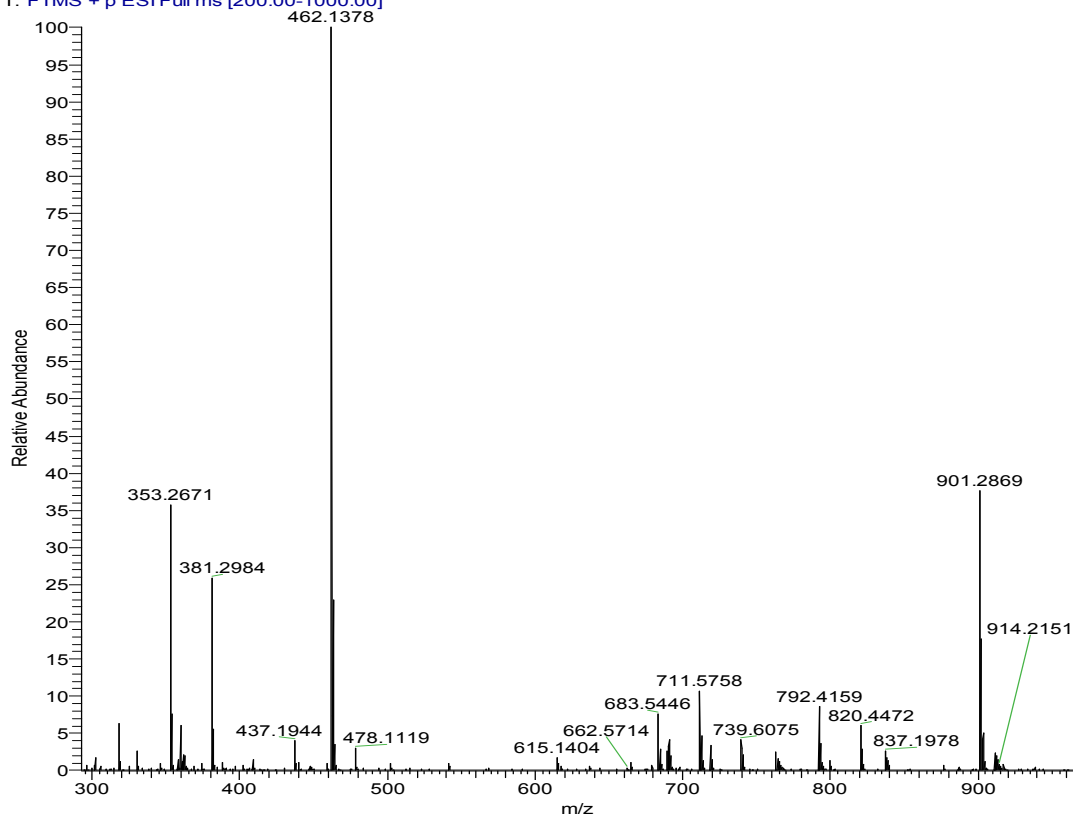

HRMS of compound 6a

CA-ACE-ALA-OH\_191025130029 #1 RT: 0.00 AV: 1 NL: 1.49E8  
T: FTMS + p ESI Full ms [200.00-1000.00]

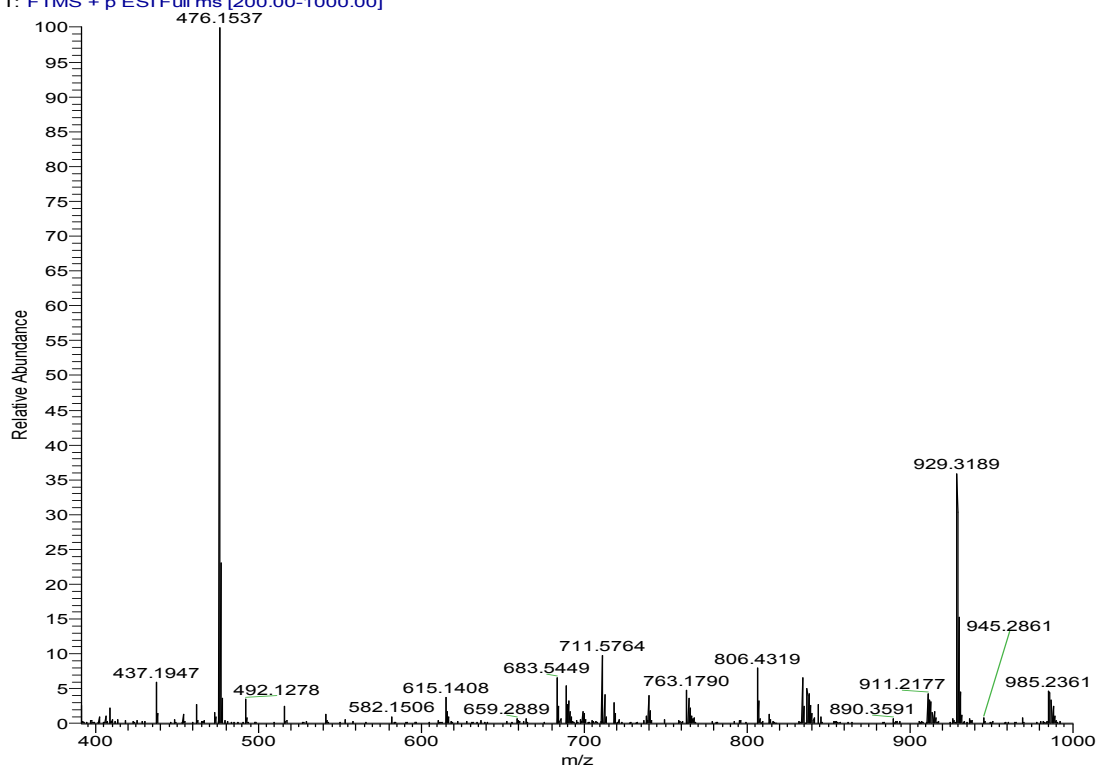

HRMS of compound 6b

CA-ACE-VAL-OH\_191025134506 #1 RT: 0.00 AV: 1 NL: 6.62E7  
T: FTMS + p ESI Full ms [200.00-1000.00]

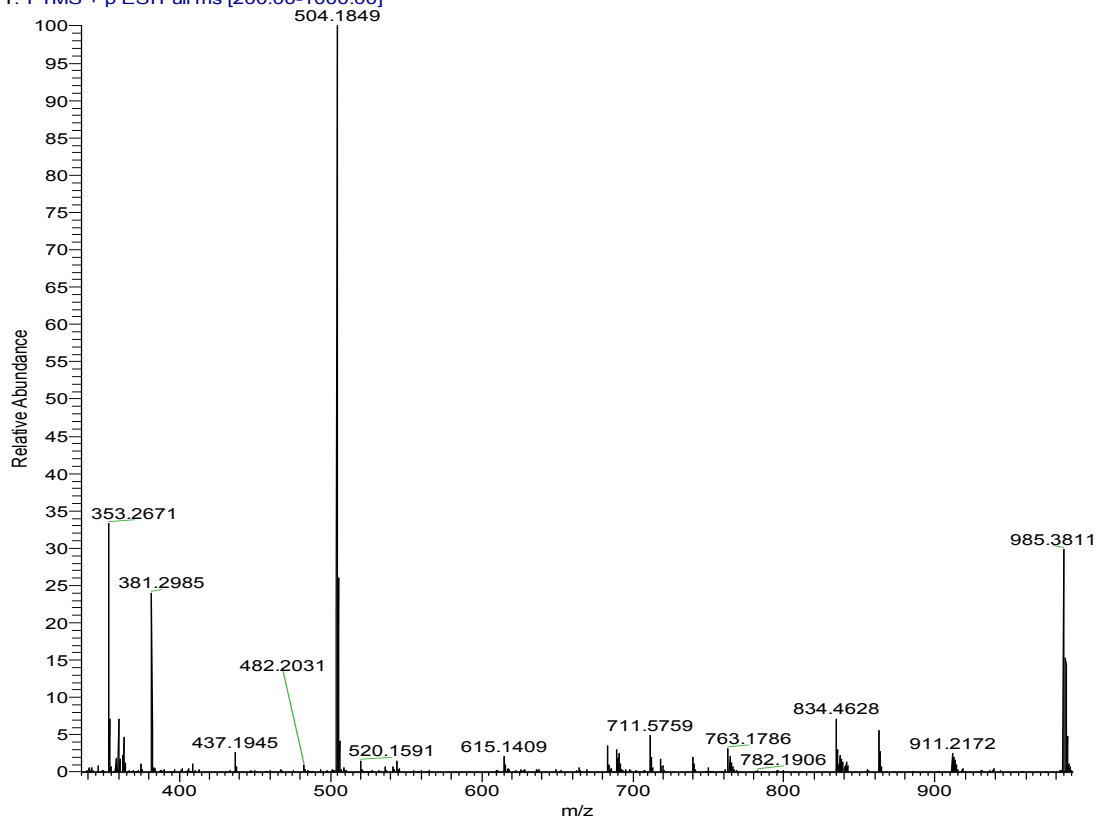

HRMS of compound 6c

CA-ACE-LEU-OH\_191025135938 #1 RT: 0.00 AV: 1 NL: 6.92E7  
T: FTMS + p ESI Full ms [200.00-1000.00]

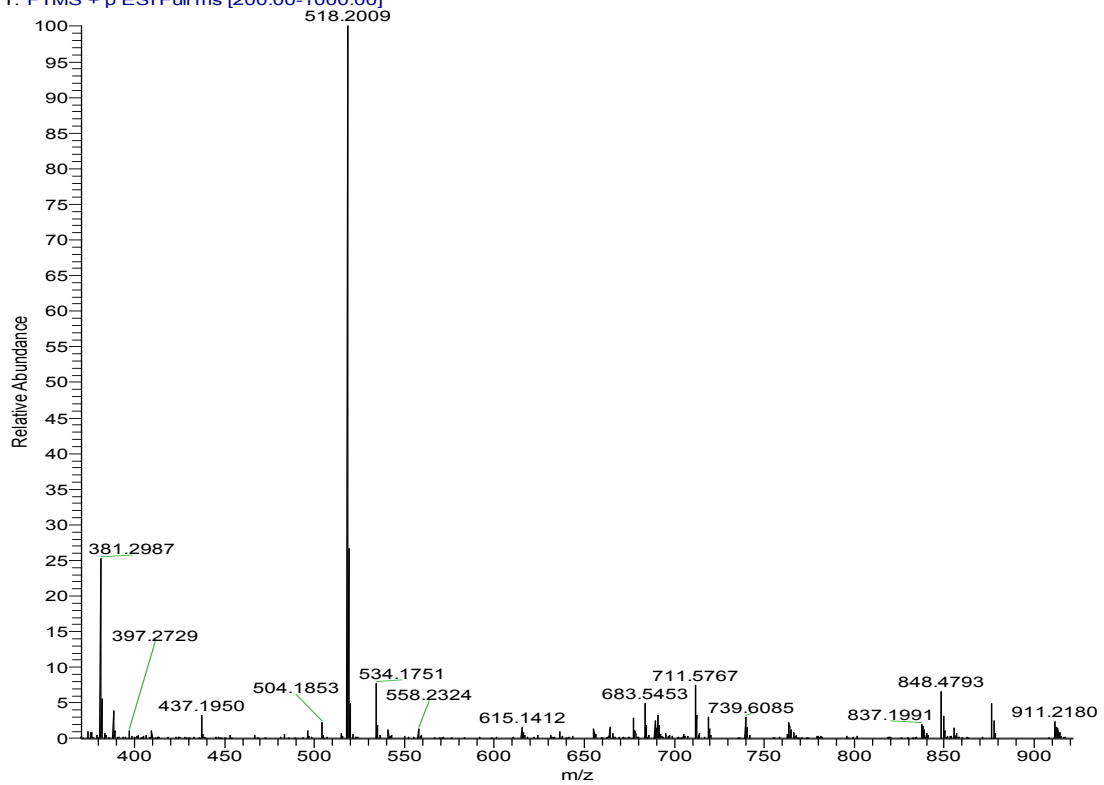

HRMS of compound 6d

CA-ACE-PHE-OH\_191025135913 #1 RT: 0.01 AV: 1 NL: 4.50E7  
T: FTMS + p ESI Full ms [200.00-1000.00]

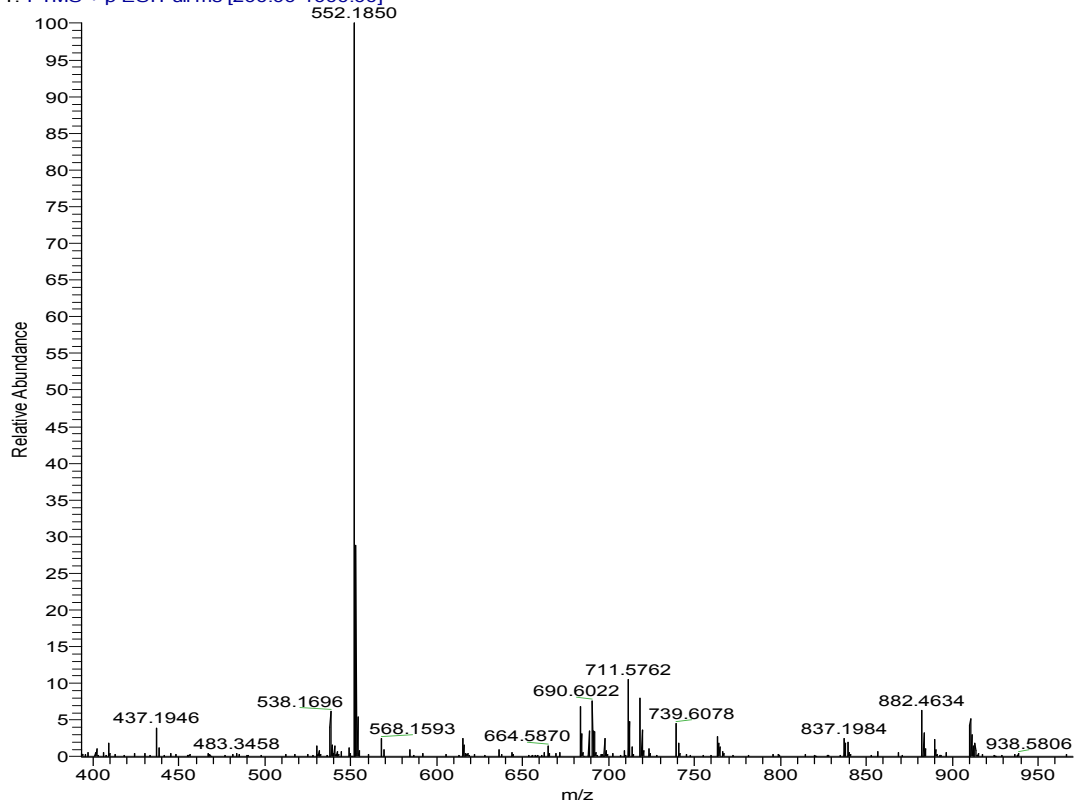

HRMS of compound 6e

CA-ACE-TRP-OH\_191025141711 #1 RT: 0.00 AV: 1 NL: 7.33E7  
T: FTMS + p ESI Full ms [200.00-1000.00]

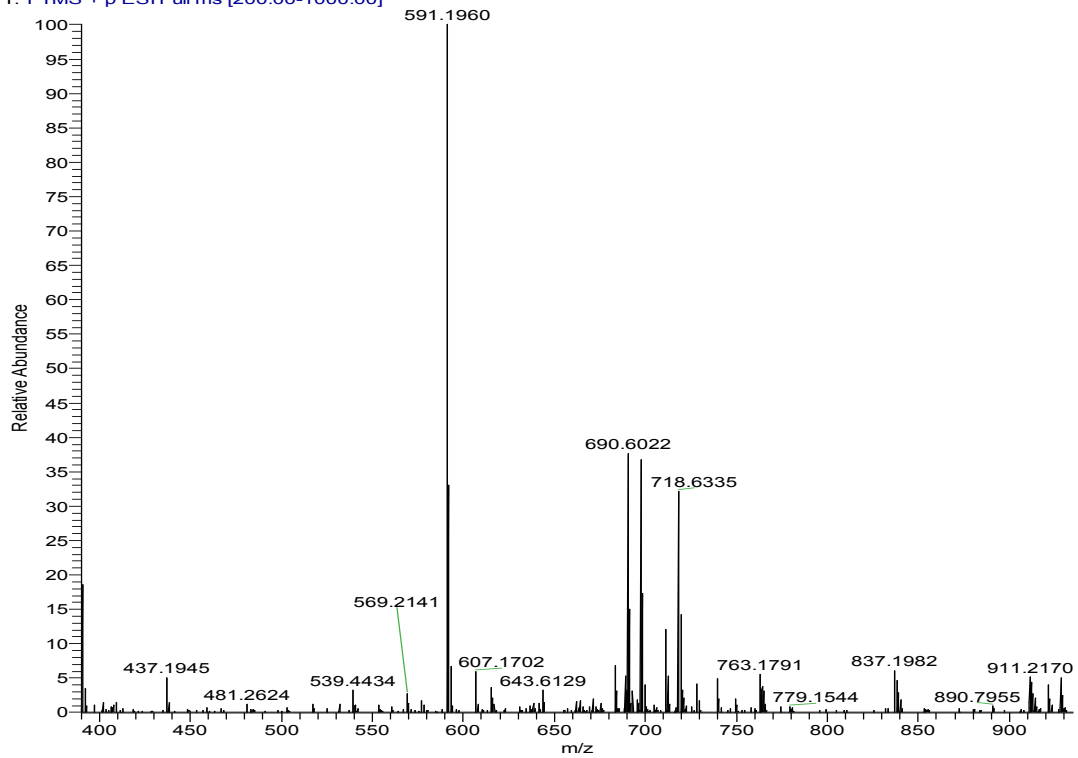

HRMS of compound 6f

| <b>Supplementary Table 1. Primers used for quantitative real-time PCR</b> |                                        |                                        |
|---------------------------------------------------------------------------|----------------------------------------|----------------------------------------|
| <b>Gene</b>                                                               | <b>Forward primer sequence (5'-3')</b> | <b>Reverse primer sequence (5'-3')</b> |
| SREBP1<br>c                                                               | CCATGGATGCACTTTCGAA                    | CCAGCATAGGGTGGGTCAA                    |
| ACC                                                                       | TGATGTCAATCTCCCCGCAGC                  | TTGCTTCTTCTCTGTTTTCTCCCC               |
| FAS                                                                       | CGGTACGCGACGGCTGCCTG                   | GCTGCTCCACGAACTCAAACACC<br>G           |
| $\beta$ -actin                                                            | CCTGGCACCCCAGCACAAT                    | GCCGATCCACACACGGAGTACT                 |
